# Supplementary material for: Exposition aus Sicht niedergelassener Verhaltenstherapeutinnen und Verhaltenstherapeuten
Source: Atypon-hosted journal article supplement (doi:10.1026/1616-3443/a000441), 2017-10-01
Supplement: 1616-3443_a000441_esm1.pdf [file 1616-3443_a000441_esm1.pdf]

**Elektronische Supplemente**

Exposition aus Sicht niedergelassener Verhaltenstherapeutinnen und Verhaltenstherapeuten: Anwendung und systemische Barrieren

Andre Pittig & Jürgen Hoyer

Institut für Klinische Psychologie und Psychotherapie, Technische Universität Dresden

Tabelle S1. *Items und mittlere Zustimmungen (mit Standardabweichung) zu Barrieren*

| Item                                                                                                                                                                | Gesamt |        | OPK  |        | NRW  |        |
|---------------------------------------------------------------------------------------------------------------------------------------------------------------------|--------|--------|------|--------|------|--------|
|                                                                                                                                                                     | M      | SD     | M    | SD     | M    | SD     |
| Zusätzlicher zeitlicher Aufwand durch längere Anreisen ist schwer oder nicht abzurechnen.                                                                           | 4.01   | (1.03) | 4.02 | (1.03) | 4.01 | (1.04) |
| Wenn Expositionsübungen außerhalb der Therapieräume stattfinden, sind die rechtlichen Rahmenbedingungen und der Versicherungsschutz unklar (z.B. bei einem Unfall). | 3.95   | (1.09) | 4.01 | (1.03) | 3.89 | (1.15) |
| Finanzielle Ausgaben des/der Therapeuten/Therapeutin werden nicht erstattet bzw. die Erstattung ist zu aufwendig (z.B. Fahrtkosten).                                | 3.92   | (1.12) | 3.92 | (1.10) | 3.76 | (1.22) |
| Abbrechung von längeren Expositionsblöcken (> 3 Sitzungen) ist unklar.                                                                                              | 3.74   | (1.14) | 3.79 | (1.11) | 3.67 | (1.26) |
| Expositionsblöcke verbrauchen zu viel vom festgelegten Stundenkontingent auf einmal.                                                                                | 3.67   | (1.22) | 3.67 | (1.21) | 3.65 | (1.35) |
| Aufwendige Vorbereitung und Planung (z. B. Finden einer geeigneten Situation) wird nicht vergütet.                                                                  | 3.65   | (1.29) | 3.65 | (1.27) | 3.62 | (1.19) |
| Expositionsübungen beinhalten finanzielle Kosten, die sich Klienten/innen nicht leisten können (z.B. Fahrkarten für öffentliche Verkehrsmittel).                    | 3.52   | (1.14) | 3.59 | (1.12) | 3.36 | (1.35) |
| Höhe der Vergütung von Exposition rechtfertigt den zusätzlichen Aufwand nicht.                                                                                      | 3.31   | (1.29) | 3.28 | (1.27) | 3.35 | (1.18) |
| Mangelhafte Absprache mit den zuständigen Ärzten bzgl. Zuweisung oder Medikamenten (z.B. Anxiolytika) erschwert die Exposition.                                     | 2.89   | (1.12) | 2.92 | (1.10) | 2.81 | (1.17) |
| Private Krankenkassen bewilligen Exposition nicht.                                                                                                                  | 2.60   | (1.01) | 2.64 | (0.96) | 2.54 | (1.28) |
| Abrechnung von Exposition mit der Krankenversicherung ist problematischer als bei anderen Therapieformen.                                                           | 2.58   | (1.23) | 2.60 | (1.21) | 2.51 | (1.24) |
| Expositionsübungen können nur schwer mit der Krankenkasse abgerechnet werden.                                                                                       | 2.52   | (1.24) | 2.53 | (1.24) | 2.49 | (1.11) |
| Zu wenig Fortbildungsangebote, um die Durchführung expositions-basierter Interventionen zu lernen.                                                                  | 2.43   | (1.10) | 2.47 | (1.09) | 2.33 | (1.14) |
| Erlernen von expositionsbasierten Interventionen ist zu teuer.                                                                                                      | 2.13   | (0.99) | 2.16 | (0.96) | 2.05 | (1.05) |
| Expositionstherapie wird von Gutachtern nicht bewilligt oder hinterfragt.                                                                                           | 1.91   | (0.96) | 1.94 | (0.97) | 1.83 | (0.93) |

*Anmerkungen.* OPK = Befragung im Bereich der Ostdeutschen Psychotherapeutenkammer (Sachsen, Sachsen-Anhalt, Thüringen, Brandenburg, Mecklenburg-Vorpommern); NRW = Nordrhein-Westfalen; KJP = Kinder und Jugendpsychotherapie. Zustimmung wurde auf einer 5-stufigen Likert Skala angegeben (von 1 = Starke Ablehnung bis 5 = Starke Zustimmung).

Tabelle S2. *Items und mittlere Zustimmungen (mit Standardabweichung) zu Veränderungen*

| Item                                                                                                       | Gesamt |        | OPK  |        | NRW  |        |
|------------------------------------------------------------------------------------------------------------|--------|--------|------|--------|------|--------|
|                                                                                                            | M      | SD     | M    | SD     | M    | SD     |
| Sitzungen für Expositionsblöcke können zusätzlich zum normalen Stundenkontingent bewilligt werden.         | 4.17   | (0.87) | 4.16 | (0.84) | 4.49 | (0.88) |
| Klarer Versicherungsstatus für Exposition außerhalb der eigenen Behandlungsräume.                          | 4.20   | (0.97) | 4.25 | (0.93) | 4.46 | (0.79) |
| Einfache Kostenerstattung von Ausgaben des Therapeuten/der Therapeutin während der Exposition.             | 4.28   | (0.87) | 4.29 | (0.86) | 4.28 | (0.88) |
| Einfache Möglichkeit zur Kostenerstattung von Ausgaben des Klienten/der Klientin im Rahmen der Exposition. | 4.20   | (0.96) | 4.22 | (0.93) | 4.19 | (0.93) |
| Flexible Planung der Therapiestunden ohne zusätzlichen Aufwand bei der Beantragung von Blocksitzungen.     | 4.52   | (0.74) | 4.54 | (0.72) | 4.14 | (1.01) |
| Höhere Vergütung oder ein Sonderzuschlag für Expositionsblöcke.                                            | 3.59   | (1.05) | 3.62 | (1.00) | 4.09 | (1.06) |
| Möglichkeit den Klienten/die Klientin für längere Expositionsblöcke krankzuschreiben.                      | 4.53   | (0.77) | 4.55 | (0.72) | 3.53 | (1.18) |
| Kürzere Wartezeiten, um eine sofortige Behandlung zu ermöglichen.                                          | 3.02   | (1.06) | 3.12 | (1.01) | 3.17 | (1.23) |
| Angebot einer spezifischen Supervision/Intervision für Exposition.                                         | 3.38   | (1.19) | 3.46 | (1.16) | 2.75 | (1.13) |
| Mehr Fortbildungen zum Thema Expositionstherapie.                                                          | 2.90   | (1.16) | 2.86 | (1.04) | 2.56 | (1.16) |

*Anmerkungen.* OPK = Befragung im Bereich der Ostdeutschen Psychotherapeutenkammer (Sachsen, Sachsen-Anhalt, Thüringen, Brandenburg, Mecklenburg-Vorpommern); NRW = Nordrhein-Westfalen; KJP = Kinder und Jugendpsychotherapie. Zustimmung wurde auf einer 5-stufigen Likert Skala angegeben (von 1 = Starke Ablehnung bis 5 = Starke Zustimmung).

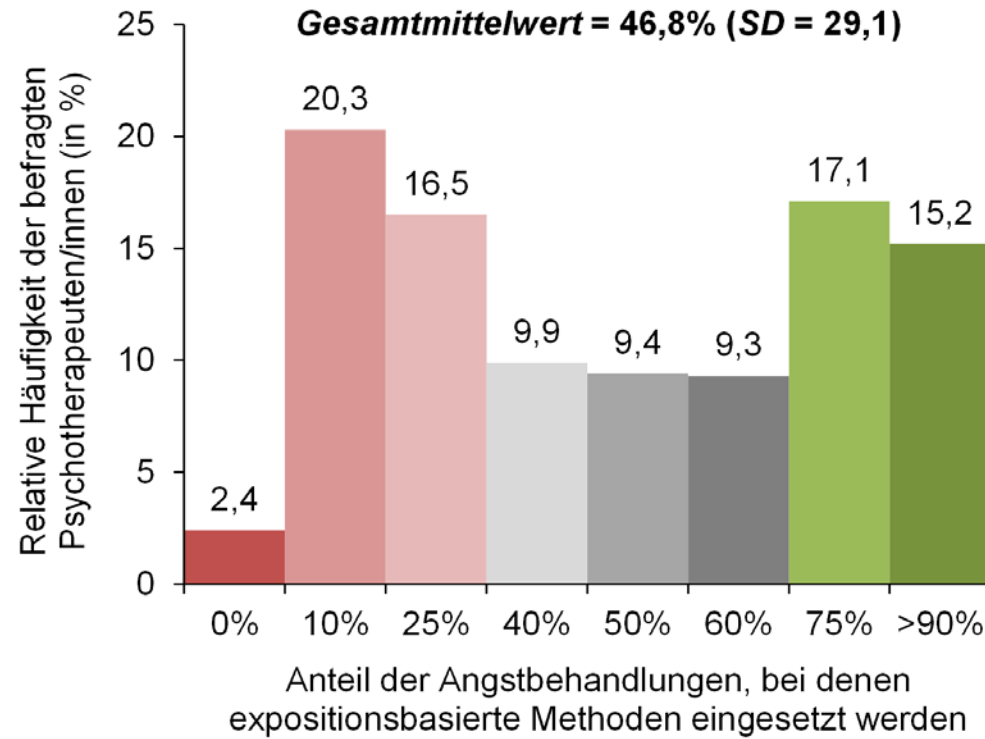

Abbildung 1. Selbstberichteter Anteil der Behandlungen von Angststörungen, bei denen expositionsbasierte Methoden eingesetzt wurden.

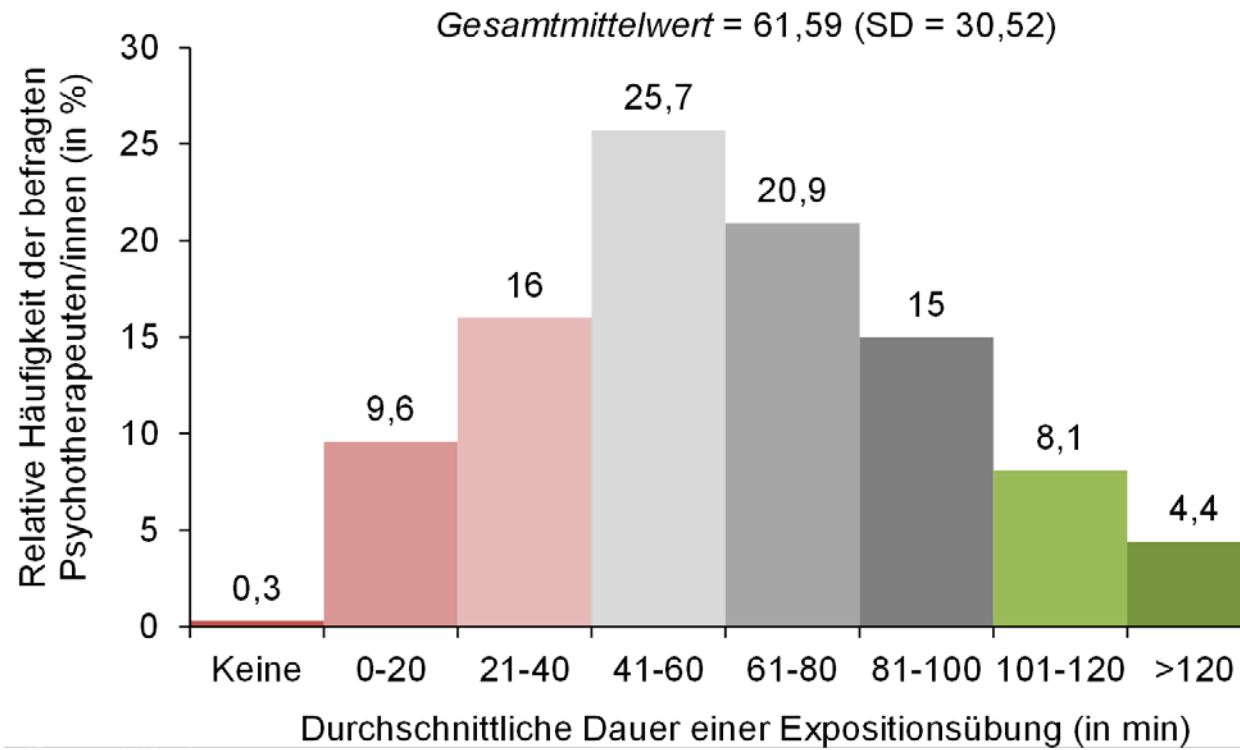

Abbildung 2. Selbstberichteter durchschnittliche Dauer einer Expositionsübung.

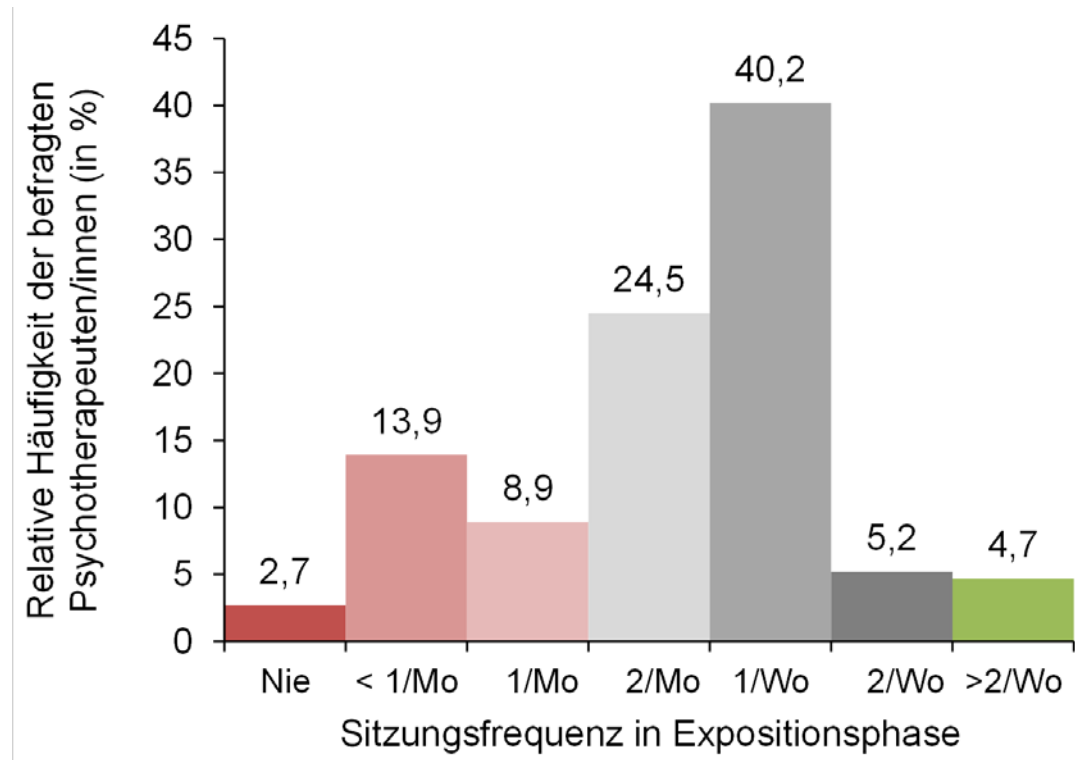

Abbildung 3. Selbstberichtete Sitzungsfrequenz während der Therapiephase, in der expositionsbasierte Methoden eingesetzt werden. Mo = Monat, Wo = Woche.

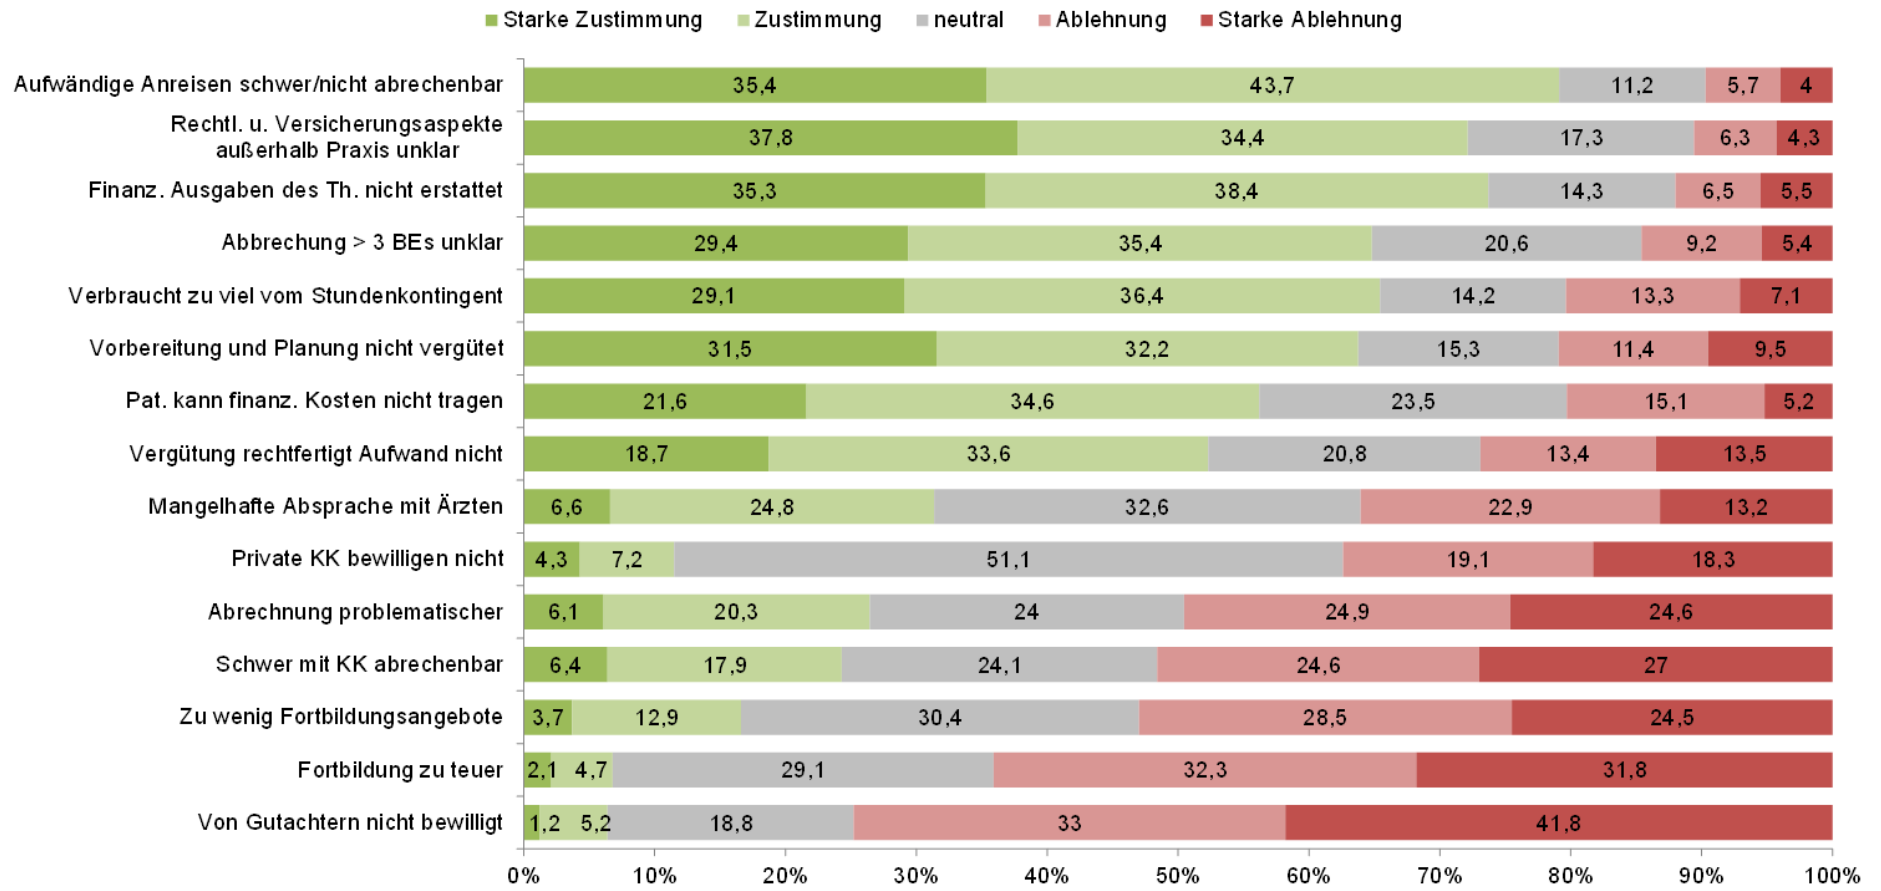

Abbildung 4. Barrieren im Versorgungssystem, die die Anwendung expositionsbasierter Verfahren erschweren, aus der Sicht ambulant tätiger Verhaltenstherapeuten/innen (N = 684).

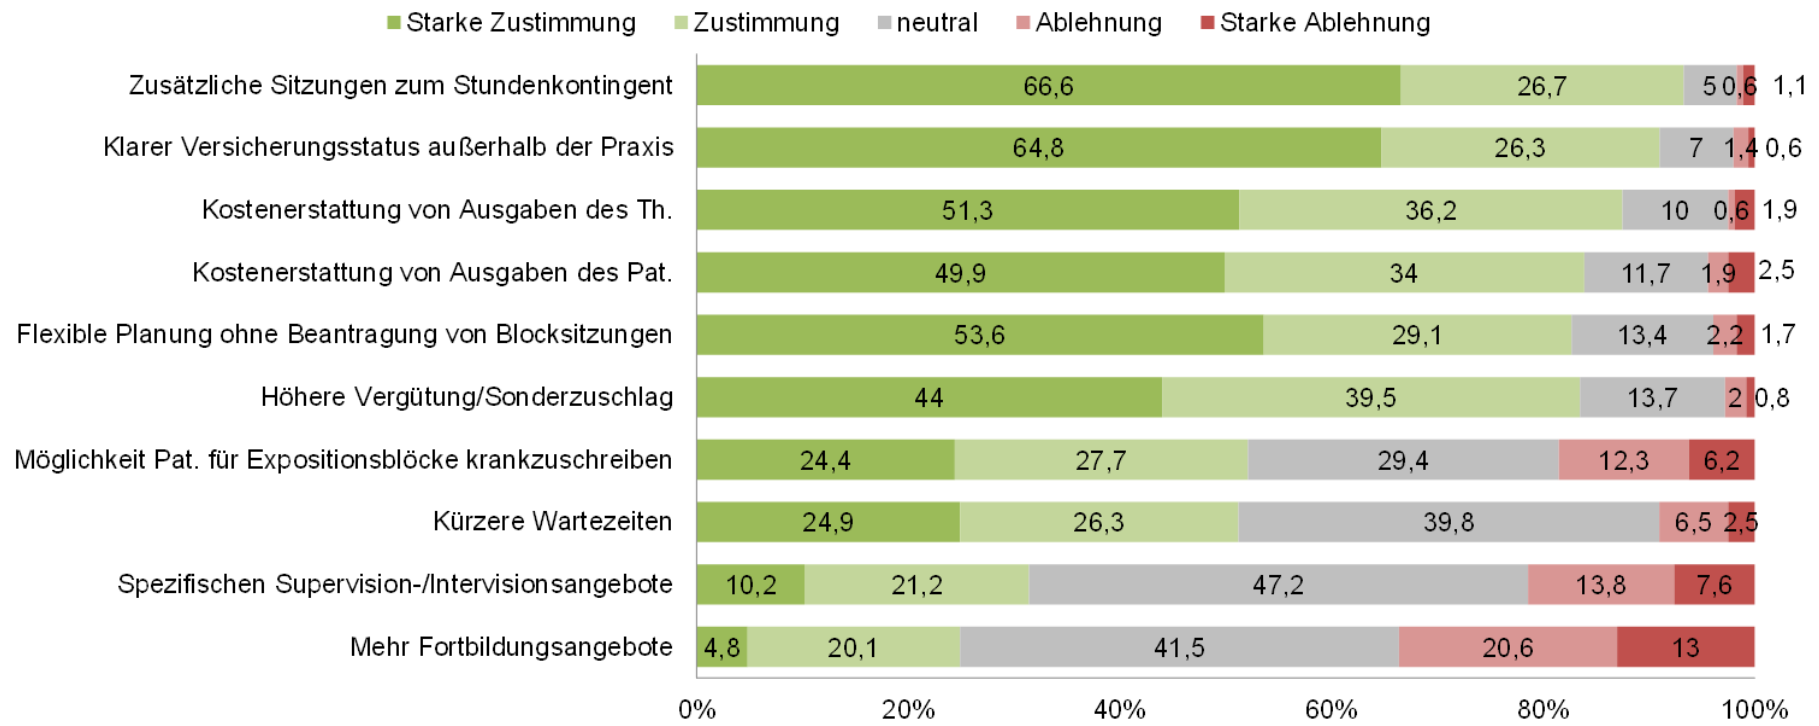

Abbildung 5. Veränderungen, die aus der Sicht ambulant tätiger Verhaltenstherapeuten/innen die Anwendung expositionsbasierter Verfahren erleichtern könnten (N = 684).
